# Supplementary material for: Acid Resistance and Ion-Exchange Capacity of Natural Mixtures of Heulandite and Chabazite
Source: MDPI journal article supplement (doi:10.3390/min13030364), 2023-03-04
Supplement: s1 [file s1]

# Supplementary Material: Acid Resistance and Ion-Exchange Capacity of Natural Mixtures of Heulandite and Chabazite

Vladimer Tsitsishvili, Marinela Panayotova \*, Nato Mirdzveli, Nagima Dzhakipbekova, Vladko Panayotov, Nanuli Dolaberidze and Manana Nijaradze

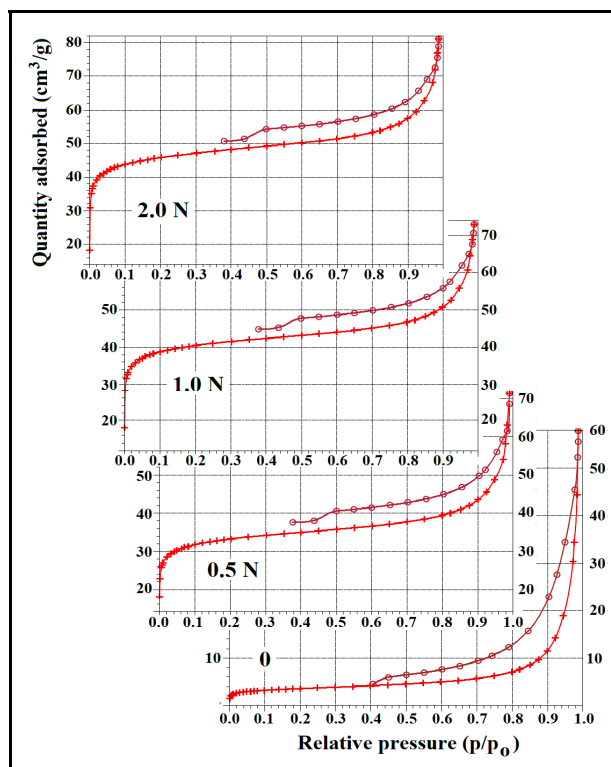

Figure S1.  $N_2$  adsorption-desorption isotherms on Georgian heulandite and its acid-treated forms.

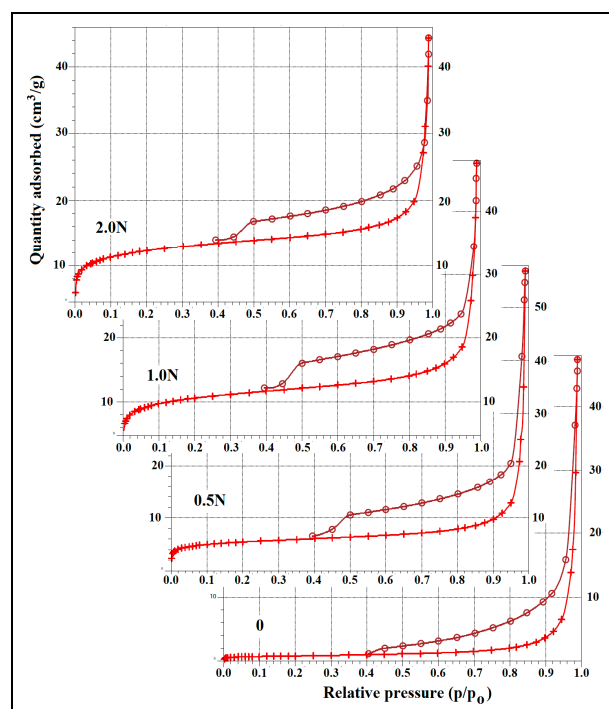

Figure S2.  $N_2$  adsorption-desorption isotherms on Kazakhstani zeolite and its acid-treated forms.
